# Supplementary material for: Spatial regulation of AMPK signaling revealed by a sensitive kinase activity reporter
Source: PubMed Central journal article supplement (PMC9256702; doi:10.1038/s41467-022-31190-x), 2022-07-05
Supplement: 41467_2022_31190_MOESM1_ESM.pdf [file 41467_2022_31190_MOESM1_ESM.pdf]

## Supplementary Figures and Tables

### Supplementary Figure 1. Development and characterization of ExRai AMPKAR.

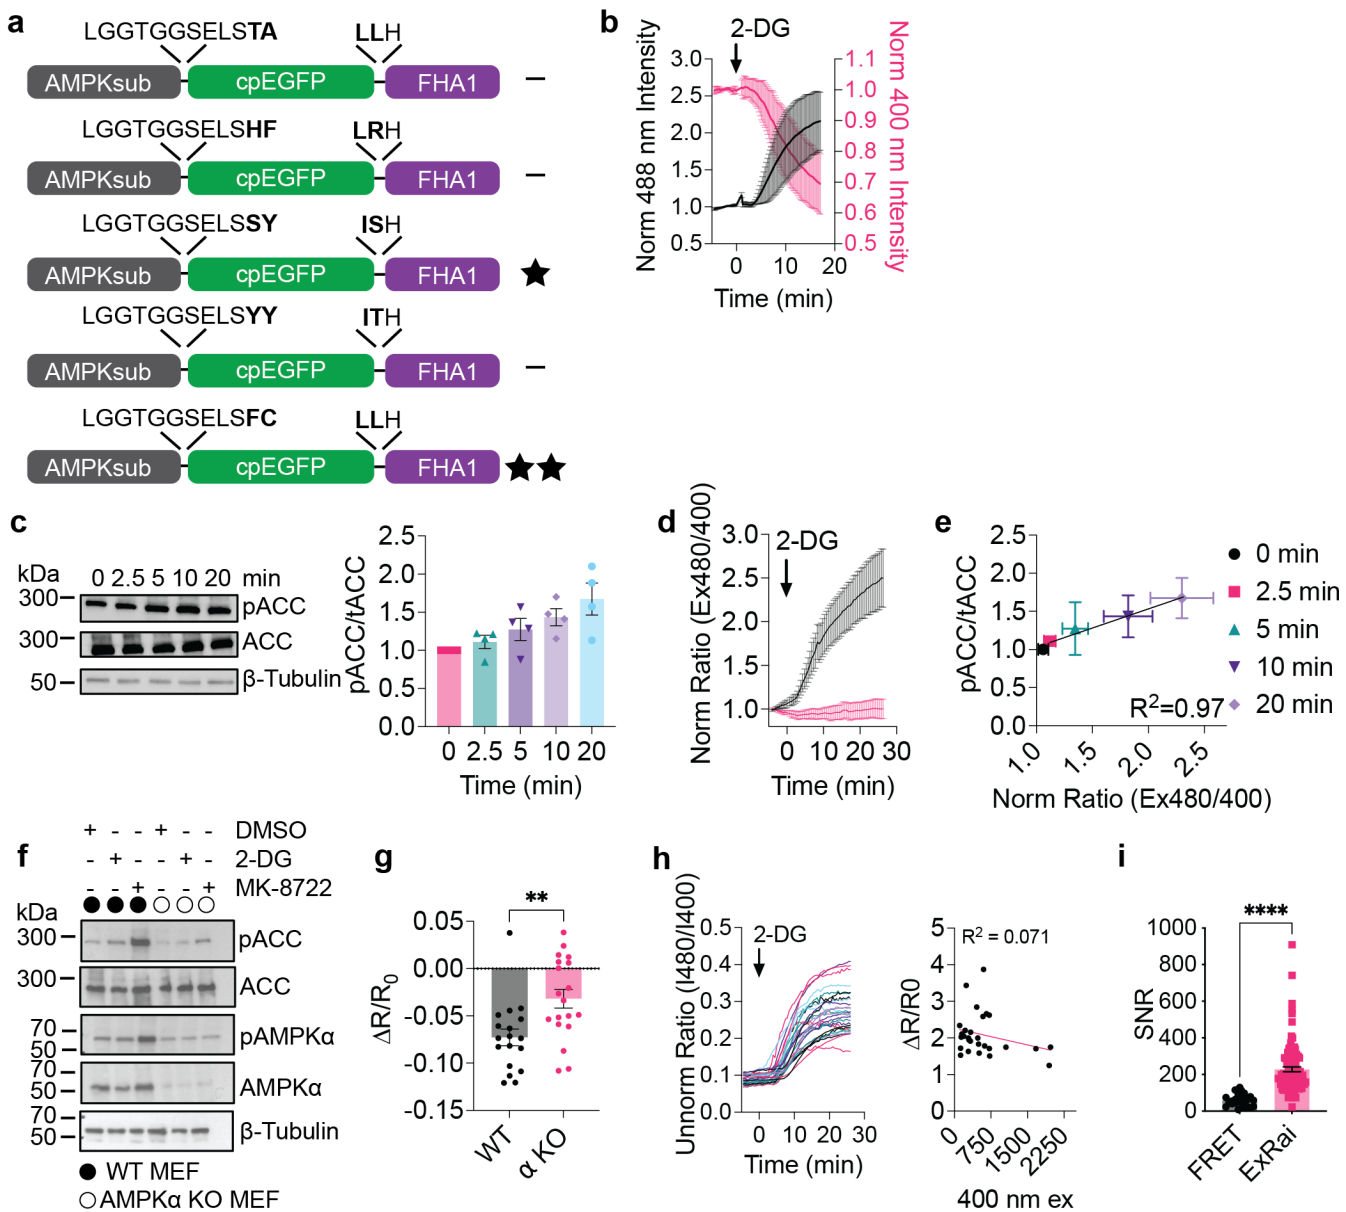

**a**, Domain structures of ExRai AMPKAR linker variants tested. Variants are scored based on performance: -, <40%; ★, 40-120%; ★★, >120% change in excitation ratio.

**b**, Average normalized 480 nm-excited fluorescence intensity (black), 400 nm-excited fluorescence intensity (pink) of Cos7 cells expressing ExRai AMPKAR in Cos7 cells treated with 2-DG (40 mM, n = 6 cells from 2 experiments).

**c**, Representative western blot and quantification of acetyl Co-A carboxylase (ACC) phosphorylation, an endogenous substrate of AMPK, in WT MEFs treated with 10 mM 2-DG for 0-20 min. Uncropped western blot shown in **Source Data**. Representative of 4 independent trials.

**d**, AMPK activity measured using ExRai AMPKAR following treatment with 10 mM 2-DG (WT MEFs black, n = 6 cells from 2 experiments; AMPK $\alpha$  KO MEFs pink, n = 6 cells from 3 experiments),

**e**, Correlation of ACC phosphorylation (reproduced from **Supplementary Fig 1c**) with ExRai AMPKAR response (reproduced from **Supplementary Fig 1d**) at indicated times. Data fit with linear regression and R<sup>2</sup> displayed on graph.

**f**, Western blot of AMPK activity in WT and AMPK KO MEFs treated with DMSO, 2-DG (40 mM), or allosteric AMPK activator MK-8722 (500 nM) for 30 min. Western blots are representative of at least 3 replicates. Full blot is shown in **Source Data**.

**g**, Ratio change ( $\Delta R/R_0$ ) of ExRai AMPKAR expressed in WT (black, n = 18 cells from 4 experiments) or AMPK KO MEFs treated with SBI-0206965 (SBI, 30  $\mu$ M; pink, n = 19 cells from 5 experiments, \*\* P = 0.0041, unpaired t-test, two-tailed).

**h**, (left) Unnormalized ExRai AMPKAR response in WT MEFs from **Fig 1e**. (right) ExRai AMPKAR response ( $\Delta R/R_0$ ) from **Fig 1e**, plotted against the initial fluorescence with 400 nm excitation (Ex 400). Data fit using linear regression, R<sup>2</sup> displayed on graph.

**i**, Signal-to-noise ratio (SNR) of FRET-based AMPK reporter ABKAR (black, n = 25 cells from 2 experiments) and ExRai AMPKAR (pink, n = 86 cells from 5 experiments, \*\*\*\*P = 3.99x10<sup>-9</sup>, unpaired t-test, two-tailed).

Time courses show the mean  $\pm$  SD, dot plots are shown as mean  $\pm$  SEM.

**Supplementary Figure 2. Investigation of dynamics of cytoplasmic, mitochondrial, and lysosomal AMPK activity using ExRai AMPKAR.**

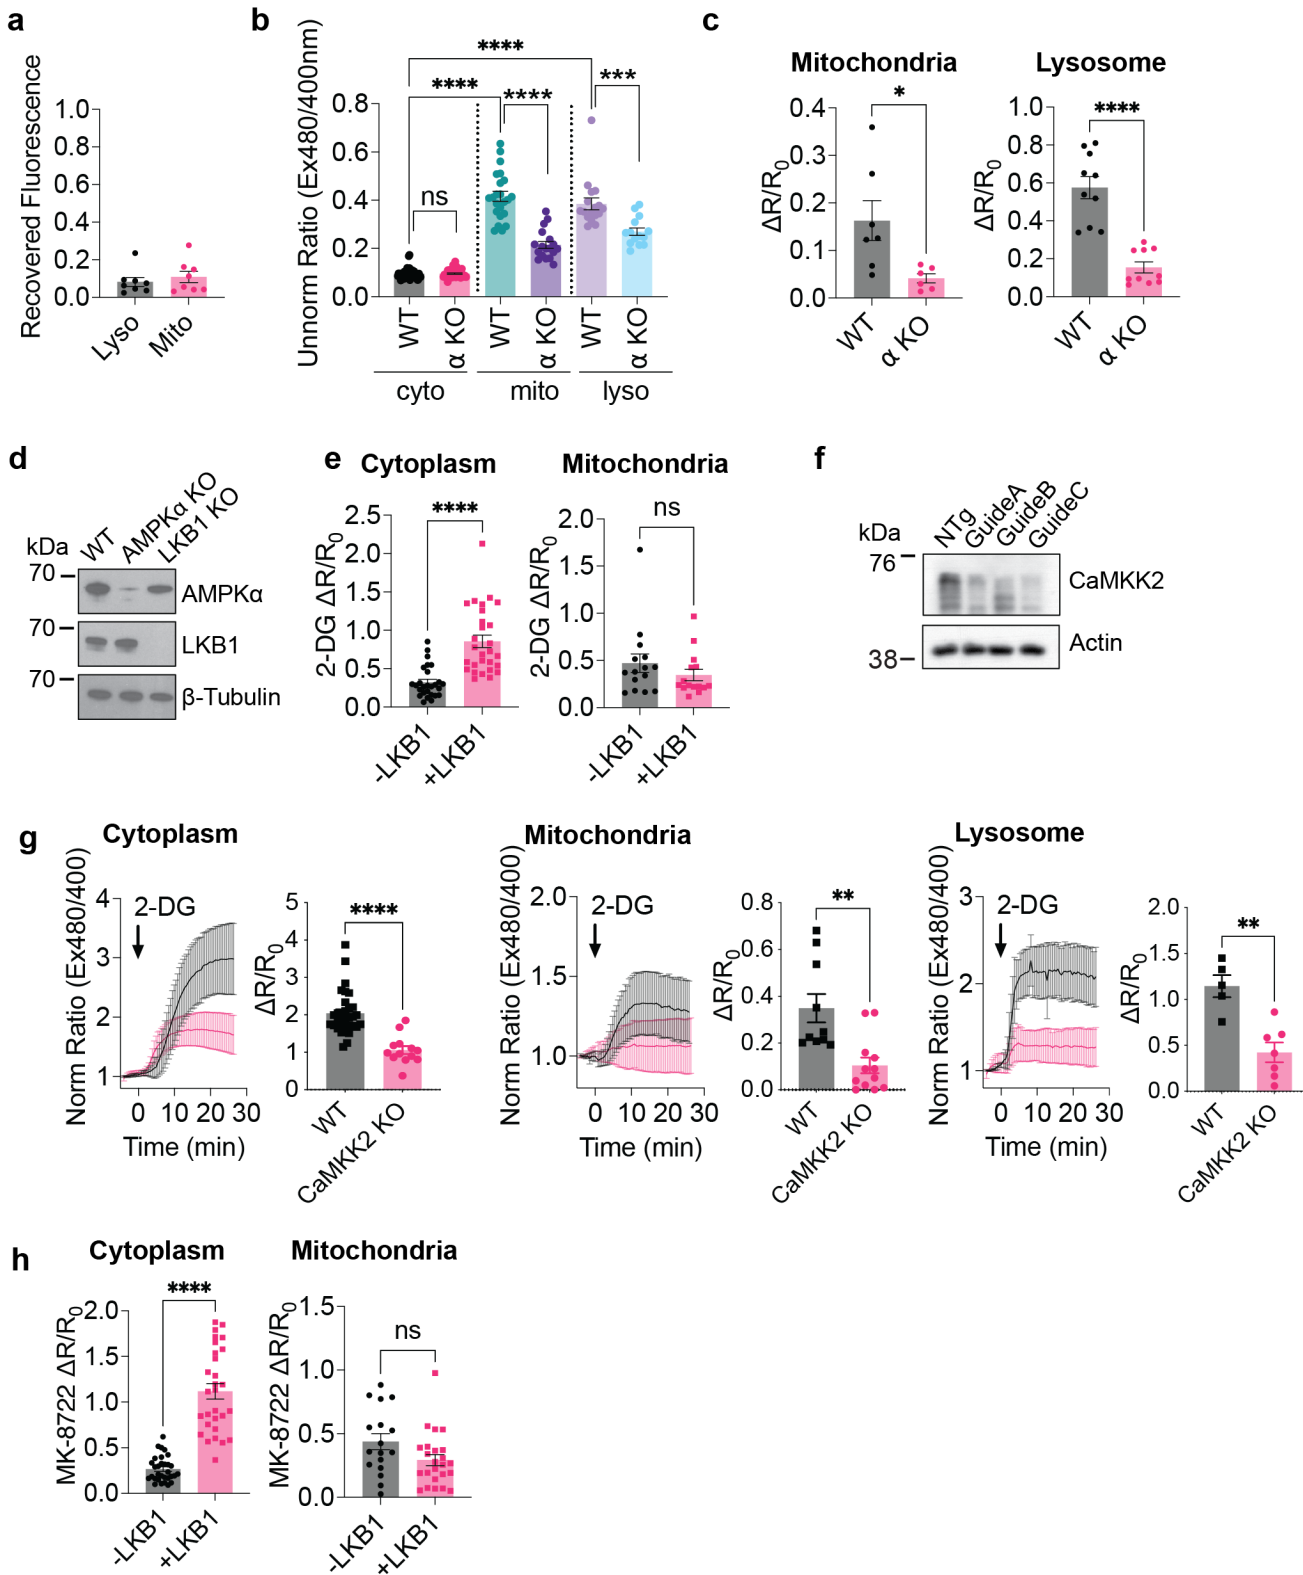

**a**, Percent fluorescence recovery after photobleaching (FRAP) of ExRai AMPKAR fused to targeting sequences for the lysosome (lyso, black, n = 8 cells from 2 experiments) or mitochondria (mito, pink, n = 8 cells from 2 experiments).

**b**, Unnormalized starting ratio of ExRai AMPKAR in the cytoplasm (WT MEFs black, n = 47 cells from at least 3 experiments; AMPK $\alpha$  KO MEFs pink, n = 40 cells from at least 3 experiments; P = 0.99, unpaired t-test, two-tailed), mitochondria (WT MEFs teal, n = 23 cells from at least 3 experiments; AMPK KO MEFs dark purple, n = 18 cells from at least 3 experiments; \*\*\*\*P =  $4.39 \times 10^{-9}$ , unpaired t-test, two-tailed), or lysosome (WT MEFs light purple, n = 17 from at least 3 experiments; AMPK $\alpha$  KO MEFs light blue n = 14 cells from at least 3 experiments; \*\*\*P = 0.0007, unpaired t-test, two-tailed). \*\*\*\* P <  $1 \times 10^{-10}$ , ANOVA with Dunnett's multiple comparison's test.

**c**, AMPK activity following treatment with 10 mM 2-DG for 30 min at mitochondria (WT MEFs black, n = 7 cells from 3 experiments; AMPK $\alpha$  KO MEFs pink, n = 6 cells from 3 experiments; \*P = 0.024, unpaired t-test, two-tailed) and lysosome (WT MEFs black, n = 10 cells from 5 experiments; AMPK $\alpha$  KO MEFs pink, n = 10 cells from 5 experiments; \*\*\*\*P =  $4.39 \times 10^{-6}$ , unpaired t-test, two-tailed).

**d**, Western blot of LKB1 expression in WT, AMPK $\alpha$  KO, and LKB1-KO MEFs, representative of at least two experiments. Full blot is shown in **Source Data**.

**e**, (Left) Maximum ExRai AMPKAR ratio change in HeLa cells without (black, n = 27 cells from 3 experiments) or with (pink, n = 28 cells from 3 experiments) mCherry-LKB1 expression in response to 2-DG (40 mM; \*\*\*\*P =  $3.01 \times 10^{-7}$ , unpaired t-test, two-tailed). (right) Maximum ratio change of mito-ExRai AMPKAR in HeLa cells without (black, n = 15 cells from 3 experiments) or with (pink, n = 15 cells from 3 experiments) mCherry-LKB1 expression in response to 2-DG (40 mM; ns P = 0.25, unpaired t-test, two-tailed).

**f**, Western blot of candidate CaMKK2 KO MEFs generated via CRISPR/Cas9. GuideC was selected for further use. Representative of at least two trials. Full western blot is shown in **Source Data**.

**g** (left) Average response to 2-DG (40 mM) stimulation of cytoplasmic ExRai AMPKAR in WT (black, reproduced from **Fig 1e**) and CaMKK2 KO MEFs (pink, n = 13 cells from 6 experiments), along with maximum ratio changes (\*\*\*\*P =  $1.74 \times 10^{-6}$ , unpaired t-test, two-tailed). (middle) Average response to 2-DG (40 mM) stimulation of mito-ExRai AMPKAR in WT (black, reproduced from **Fig 2c**) and CaMKK2 KO MEFs (pink, n = 12 cells from 6 experiments), along with maximum ratio changes (\*\* P = 0.0015, unpaired t-test, two-tailed). (right) Average response to 2-DG (40 mM) stimulation of lyso-ExRai AMPKAR in WT (black, reproduced from **Fig 2b**) and CaMKK2 KO MEFs (pink, n = 7 cells from 4 experiments), along with maximum ratio changes (\*\* P = 0.0013, unpaired t-test, two-tailed).

**h**, (Left) Maximum ratio change of cytoplasmic ExRai AMPKAR in HeLa cells without (black, n = 31 cells from 3 experiments) or with (pink, n = 29 cells from 3 experiments) mCherry-LKB1 expression in response to MK-8722 (500 nM; \*\*\*\*P =  $3.91 \times 10^{-14}$ , unpaired t-test, two-tailed). (Right) Maximum ratio change of mito-ExRai AMPKAR in HeLa cells without (black, n = 17 cells from 3 experiments) or with (pink, n = 24 cells from 3 experiments) mCherry-LKB1 expression in response to MK-8722 (500 nM; ns P = 0.056, unpaired t-test, two-tailed). Dot plots show the mean  $\pm$  SEM.

**Supplementary Figure 3. Nuclear AMPK activity is due to shuttling of AMPK $\alpha$ 2 from the cytoplasm to the nucleus.**

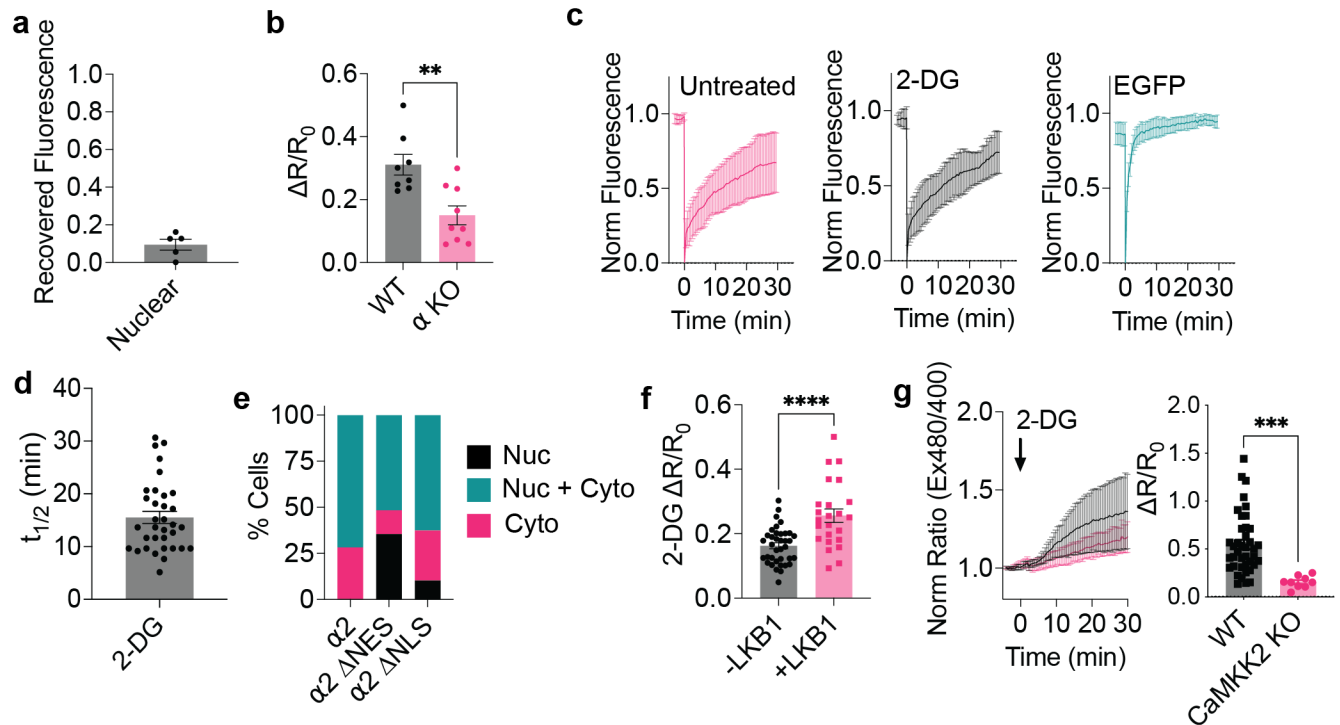

**a**, Percent fluorescence recovery after photobleaching (FRAP) of ExRai AMPKAR-NLS (n = 5 cells from 2 experiments).

**b**, AMPK activity in the nucleus following treatment with 10 mM 2-DG for 30 min in WT (black, n = 8 cells from 4 experiments) and AMPK KO MEFs (pink, n = 9 cells from 3 experiments; \*\*P = 0.0026, unpaired t-test, two-tailed).

**c**, Average FRAP recovery curves of nuclear EGFP-AMPK $\alpha$ 2 in AMPK $\alpha$  KO MEFs either untreated (pink, n = 9 cells from 3 experiments) or treated with 2-DG (black, 40 mM, n = 11 cells from 3 experiments) immediately before FRAP experiment began, as well as EGFP control (teal, n = 13 cells from 2 experiments).

**d**, Time to half-maximum of 2-DG-induced AMPK activity, analyzed from **Fig 4b**.

**e**, Quantification of mScarlet-AMPK $\alpha$ 2, mScarlet-AMPK $\alpha$ 2  $\Delta$ NES (L546A and L550A), mScarlet-AMPK $\alpha$ 2  $\Delta$ NLS (K224A) localization to either only the nucleus (nuc), cytoplasm (cyto), or nucleus and cytoplasm (nuc + cyto). Representative of two independent experiments.

**f**, Average response of nuclear-localized ExRai AMPKAR in HeLa cells without (black; n =37 cells from 4 experiments) and with (pink; n = 24 cells from 4 experiments) mCherry-LKB1 expression and treated with 2-DG (40 mM) (\*\*\*\*P =  $2.19 \times 10^{-5}$ , unpaired t-test, two-tailed).

**g**, Average response to 2-DG (40 mM) stimulation of cytoplasmic ExRai AMPKAR in WT (black, reproduced from **Fig 4b**) and CaMKK2 KO MEFs (pink, n = 9 cells from 3 experiments), along with maximum ratio changes (\*\*P = 0.0006, unpaired t-test, two-tailed). Response curves show the mean  $\pm$  SD, dot plots show the mean  $\pm$  SEM.

**Supplementary Table 1. Primers used for molecular cloning**

| <b>Primer Number</b> | <b>Purpose</b>                             | <b>Sequence (5' to 3')</b>                                   |
|----------------------|--------------------------------------------|--------------------------------------------------------------|
| 1                    | ExRai AMPKAR T/A, forward                  | GACGATAAGGATCCCATGAGGAGAGTGGCTGCTCTGGTGGATCTGGGC             |
| 2                    | ExRai AMPKAR T/A, reverse                  | CCGCCAGTGTGATGGATATCTGCAGAATTCTAGCGATCAACTTTGTTCTGCTCGAGGCA  |
| 3                    | ExRai AMPKAR, forward                      | AAGGATCCCATGAGGAGAGTGGCTACCCTG                               |
| 4                    | ExRai AMPKAR, reverse with stop codon      | CCGCCAGTGTGATGGATATCTGCAGAATTCTAGCGATCAACTTTGTTCTGCTCGAGGCA  |
| 5                    | ExRai AMPKAR, to remove stop codon forward | CAGAACAAAGTTGATCGCTATGAATTCCCCAAAAGAAG                       |
| 6                    | ExRai AMPKAR, to remove stop codon reverse | CTTCTTTTTGGGGAATTCATAGCGATCAACTTTGTTCTG                      |
| 7                    | LAMP1, forward                             | GCGCAAGCTTGCGGCCGCCACCATGGCGGCGCCCGGCAGCGCCCGG               |
| 8                    | LAMP1, reverse                             | GCGCGGATCCGCACCACCGCCACCACCGATAGTCTGGTAGCCTGCG               |
| 9                    | mScarlet-AMPKa2, forward                   | TCAGATCCGCTAGCGCTACCGGTCGCCACCATGGTGAGCAAGGGCGAGGCAGTGATCAAG |
| 10                   | mScarlet-AMPKa2, reverse                   | GCTTGAGCTCGAGATCTGAGTCCGGCCGGACTTGTACAGCTCGTCCATGCCGCCGGTGGA |
| 11                   | 3x NLS-mScarlet-AMPKa2, forward            | AGAAAGGTAGGATCCAGTATGGTGAGCAAGGGCGAGGCAGTGATCAAG             |
| 12                   | 3x NLS-mScarlet-AMPKa2, reverse            | CTTGATCACTGCCTCGCCCTTGCTCACCATACTGGATCCTACCTTTCT             |
| 13                   | AMPK $\alpha$ 2 $\Delta$ NLS               | AAGCCCAAATCTTTAGCTGTGAAAGCCGCCAAGTGGCACCTTGGGATCCG           |
| 14                   | AMPK $\alpha$ 2 $\Delta$ NES               | GAAATGTGCGCCAGTGCAATCACTGCTGCAGCCCGTTGAGGATCC                |
